# Supplementary material for: Sulfurized polyacrylonitrile cathodes with electrochemical and structural tuning for high capacity all-solid-state lithium–sulfur batteries
Source: Royal Society of Chemistry journal article supplement (doi:10.1039/d1se01187a), 2021-01-01
Supplement: d1se01187a1.pdf [file d1se01187a1.pdf]

## Supplementary Information

### **Sulfurized Polyacrylonitrile Cathodes with electrochemical and structural tuning for high capacity all-solid-state lithium-sulfur batteries**

Yaqi Hu,<sup>†a</sup> Zhen Sun,<sup>†a</sup> Furong Qin,<sup>a</sup> Na Lv,<sup>a</sup> Bingqin Li,<sup>a</sup> Liangxing Jiang,<sup>b</sup>

Zongliang Zhang,<sup>c</sup> Fangyang Liu <sup>\*a</sup>

<sup>a</sup> School of Metallurgy and Environment, Central South University, Changsha, 410083,  
P. R. China

<sup>b</sup> Engineering Research Centre of Advanced Battery Materials, Ministry of Education,  
Changsha, 410083, P. R. China

<sup>c</sup> Hunan Provincial Key Laboratory of Nonferrous Value-added Metallurgy,  
Changsha, 410083, P. R. China.

\*E-mail: [liufangyang@csu.edu.cn](mailto:liufangyang@csu.edu.cn)

<sup>†</sup>These authors contributed equally to this work.

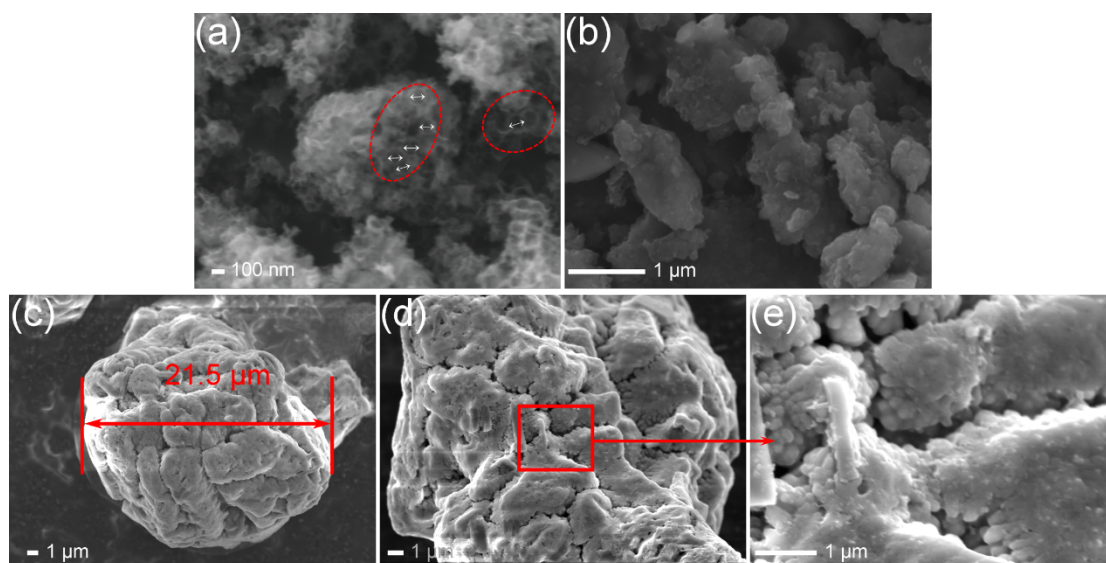

Figure S1 SEM images of (a) MaPC and (b) PAN@MaPC; (c)(d)(e) SEM images of LPSC at different magnifications

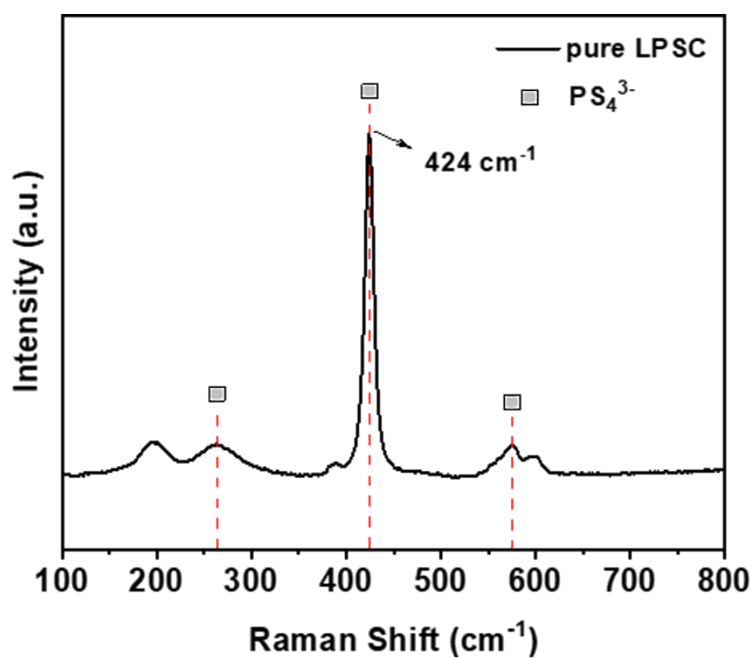

Figure S2 Raman spectra of the pure LPSC powders in range of 100 - 800 cm<sup>-1</sup>

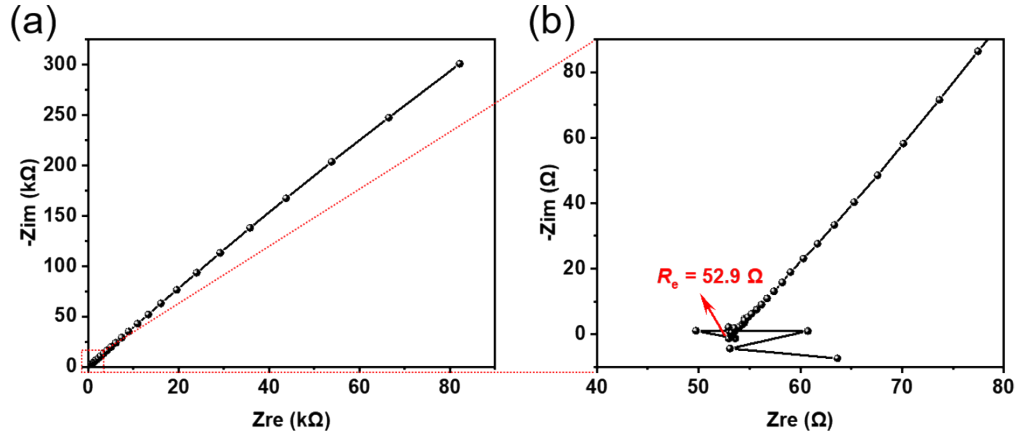

Figure S3 EIS of the symmetric cell steel|LPSC-SE|steel at room temperature

The lithium ion conductivity at room temperature is calculated as  $3.85 \times 10^{-3} \text{ S cm}^{-1}$

<sup>1</sup> according to the equation  $\sigma = \frac{d}{R_e S}$ , where the  $\sigma$  ( $\text{S cm}^{-1}$ ) denotes the lithium ion conductivity;  $d$  (cm) is the thickness of the electrolyte;  $S$  ( $\text{cm}^2$ ) is the effective area of the electrode;  $R_e$  ( $\Omega$ ) equals the bulk resistance of the electrolyte. In this work, the values of the  $d$ ,  $R_e$  and  $S$  are 0.16 cm, 52.9  $\Omega$ , and 0.785  $\text{cm}^2$ , respectively.

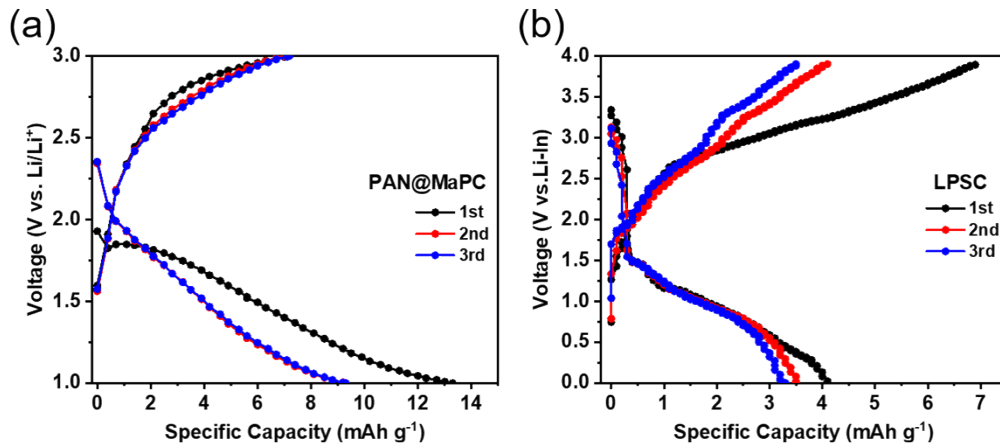

Figure S4 Charge/discharge curves of the (a) PAN@MaPC-c/LPSC-SE/Li and (b) LPSC/LPSC-SE/Li

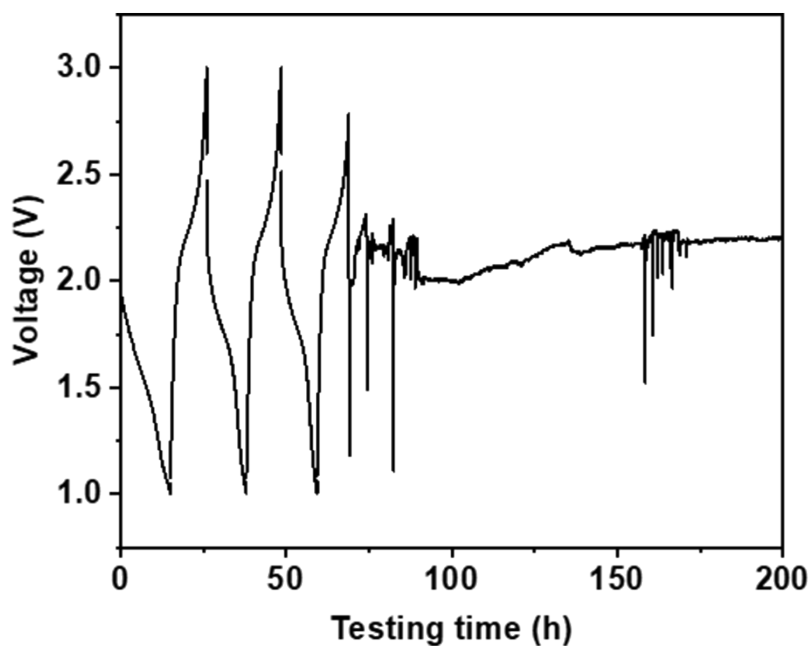

Figure S5 Charge/discharge curves of the ASSLSB using Li metal as the anode at 0.1C at room temperature

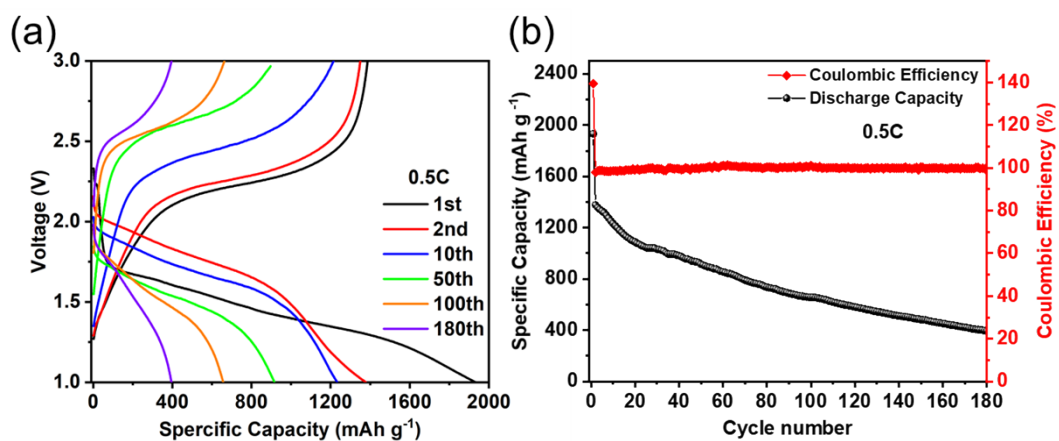

Figure S6 (a) Charge/discharge curves and (b) cycling performance of SPAN@MaPC in the liquid cell (SPAN@MaPC|Liquid Electrolyte|Li) at 0.5C at room temperature

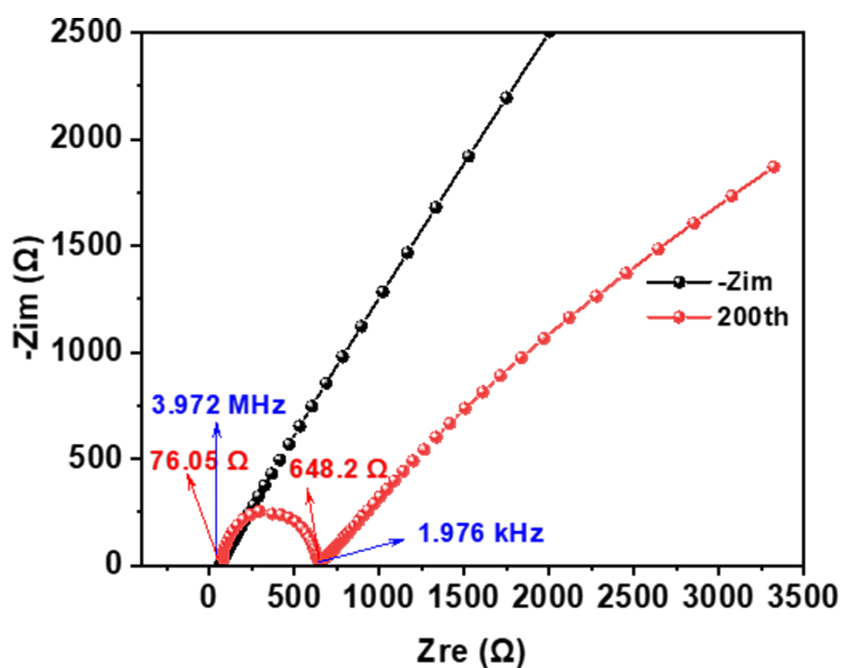

Figure S7 EIS of the SPAN@MaPC based ASSLSBs (SPAN@MaPC-ca|LPSC-SE|In-Li) before and after cycling with pure sulfur loading of  $1 \text{ mg cm}^{-2}$

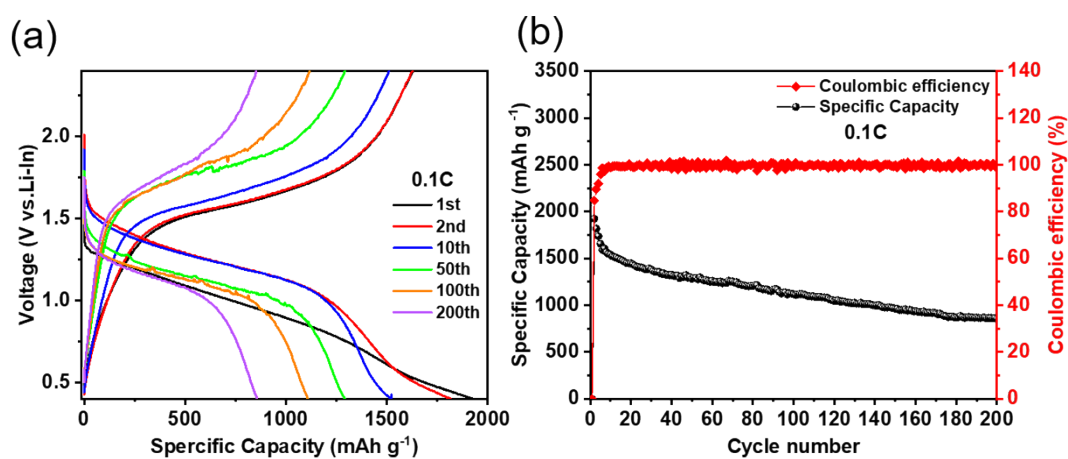

Figure S8 (a) charge/discharge and (b) cycling performance of the SPAN@MaPC based ASSLSBs (SPAN@MaPC-ca|LPSC-SE|Li-In) with sulfur loading of  $0.6 \text{ mg cm}^{-2}$  at  $0.1 \text{ C}$  at room temperature

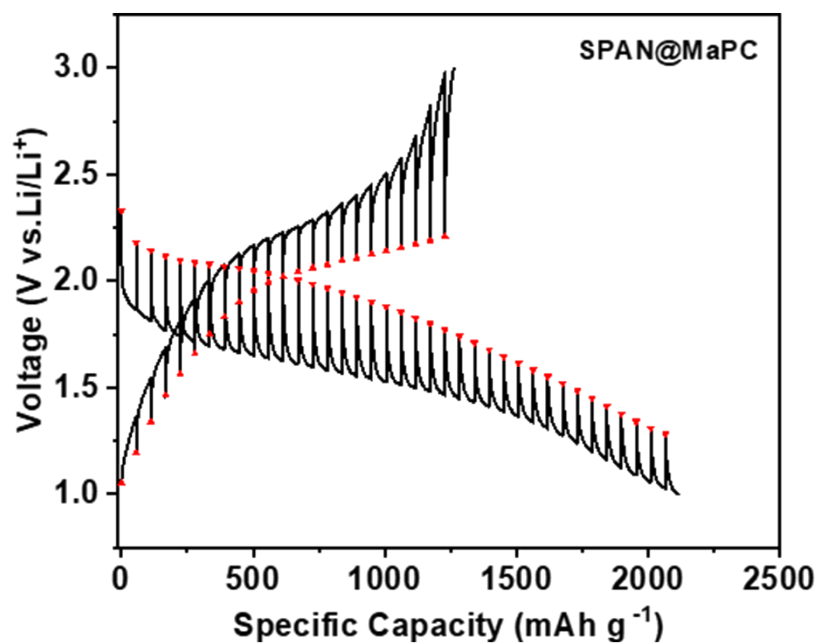

Figure S9 GITT charge/discharge curve of SPAN@MaPC based ASSLSBs (SPAN@MaPC-ca|LPSC-SE|Li)

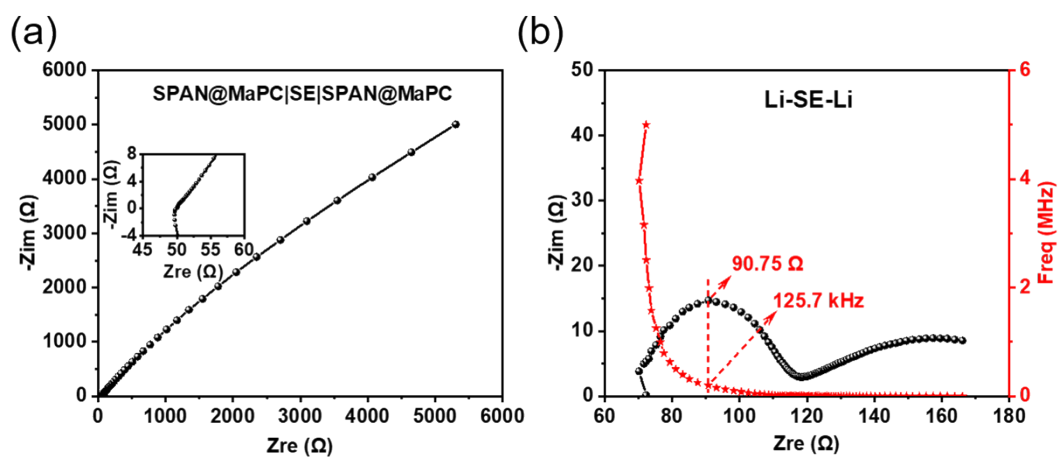

Figure S10 EIS of the (a) SPAN@MaPC-ca|LPSC-SE|SPAN@MaPC-ca and (b) Li|LPSC-SE|Li symmetrical cells

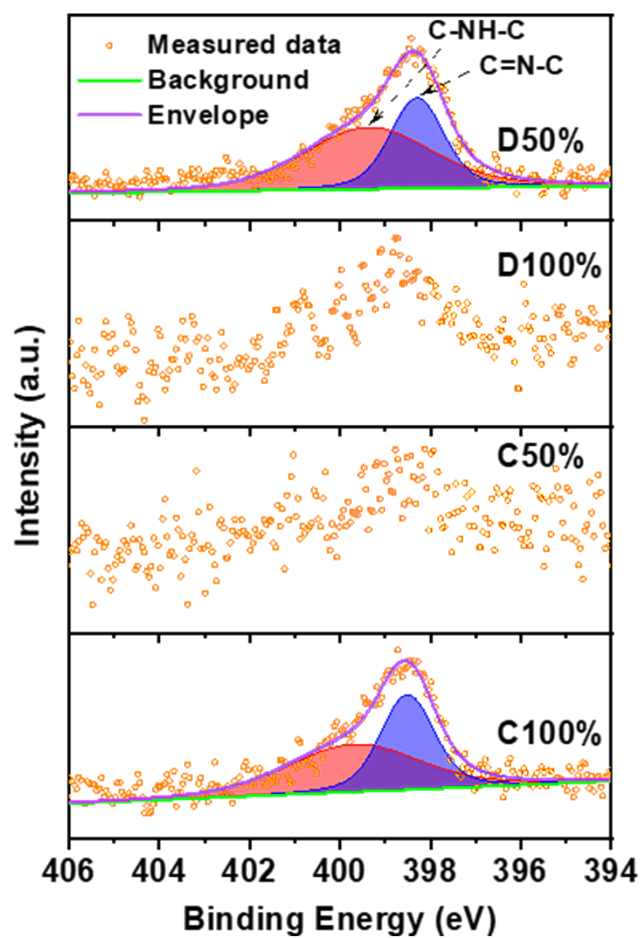

Figure S11 N 1s spectra for the SPAN@MaPC cathode in the ASSLSBs (PAN@MaPC-ca|LPSC-SE|Li) at various states of charge in the first cycle
